# Supplementary material
Source: MDPI journal article supplement (https://www.mdpi.com/2411-5142/6/2/50)

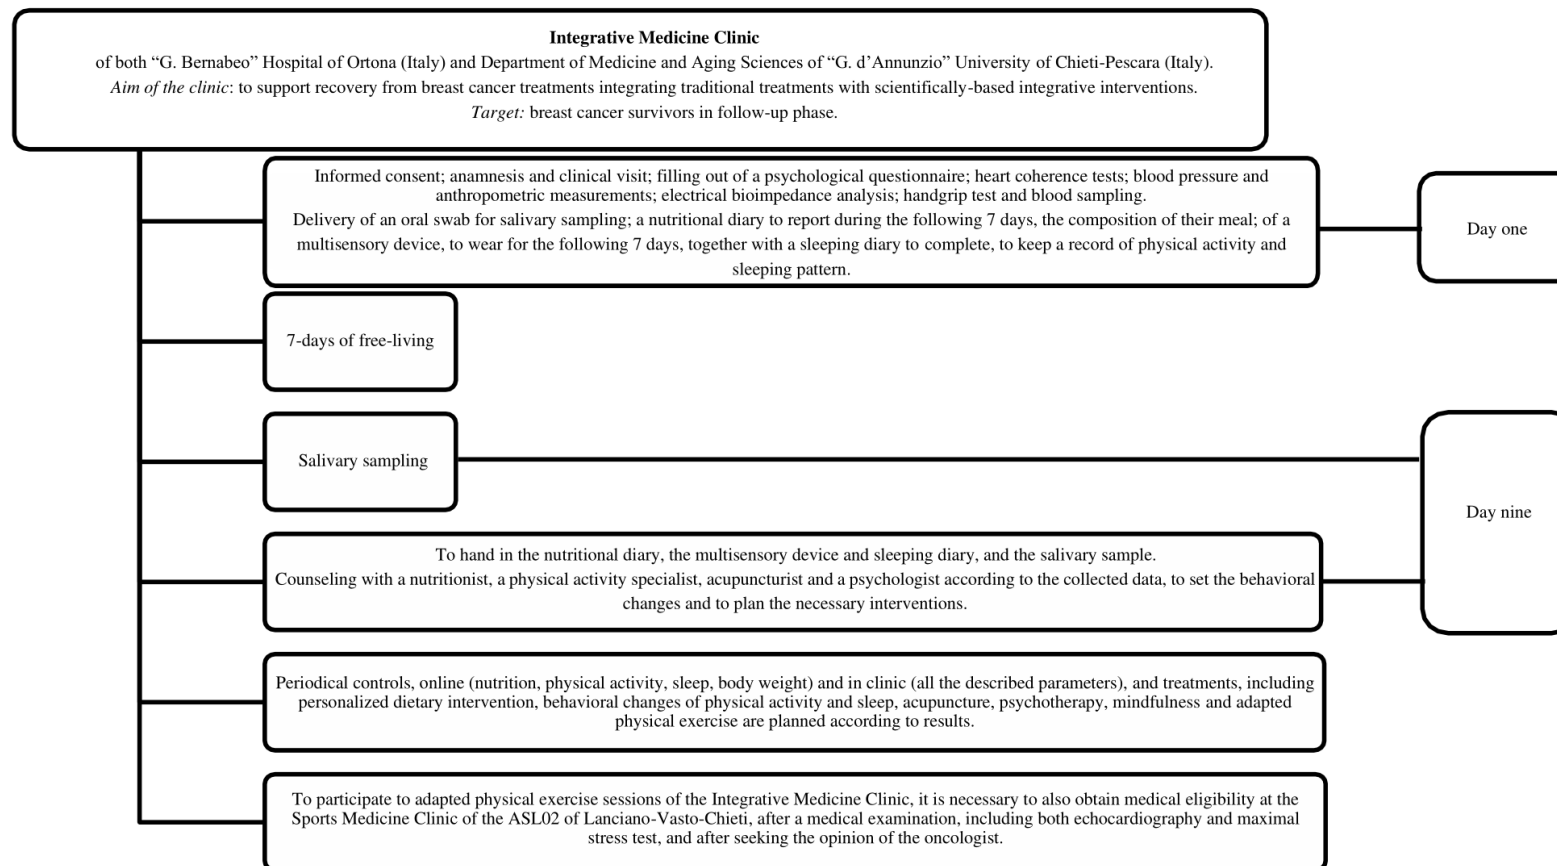

Figure S1. *Study design*

Supplement: s1 [file s1]
